# Supplementary material for: The Pseudoalteromonas luteoviolacea L-amino Acid Oxidase with Antimicrobial Activity Is a Flavoenzyme
Source: MDPI journal article supplement (doi:10.3390/md16120499), 2018-12-12
Supplement: s1 [file s1]

# Supplementary Materials

## The *Pseudoalteromonas luteoviolacea* L-amino Acid Oxidase with Antimicrobial Activity is A Flavoenzyme

Andrés Andreo-Vidal <sup>1</sup>, Antonio Sanchez-Amat <sup>1,\*</sup> and Jonatan C. Campillo-Brocal <sup>1,2,\*</sup>

<sup>1</sup> Department of Genetics and Microbiology, University of Murcia, Murcia 30100, Spain; andres.andreo@um.es (A.A.-V.)

<sup>2</sup> Department of Industrial Biotechnology, School of Engineering Sciences in Chemistry, Biotechnology and Health (CBH), KTH Royal Institute of Technology, AlbaNova University Center, SE-106 91, Stockholm, Sweden

\* Correspondence: antonio@um.es (A.S.-A.); jonatancristian.campillo@um.es (J.C.C.-B.); Tel. +34-868-884-955 (A.S.-A.); +34-606-634-475 (J.C.C.-B.)

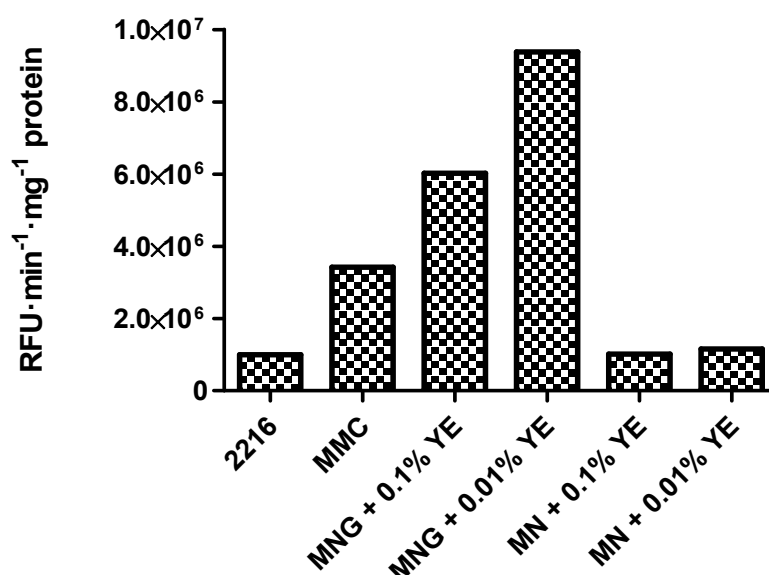

**Figure S1.** LAAO activity in the supernatants of strain CPMOR-2 cultivated in different media at the stationary phase. LAAO activity was assayed using casamino acids 2% as a substrate.

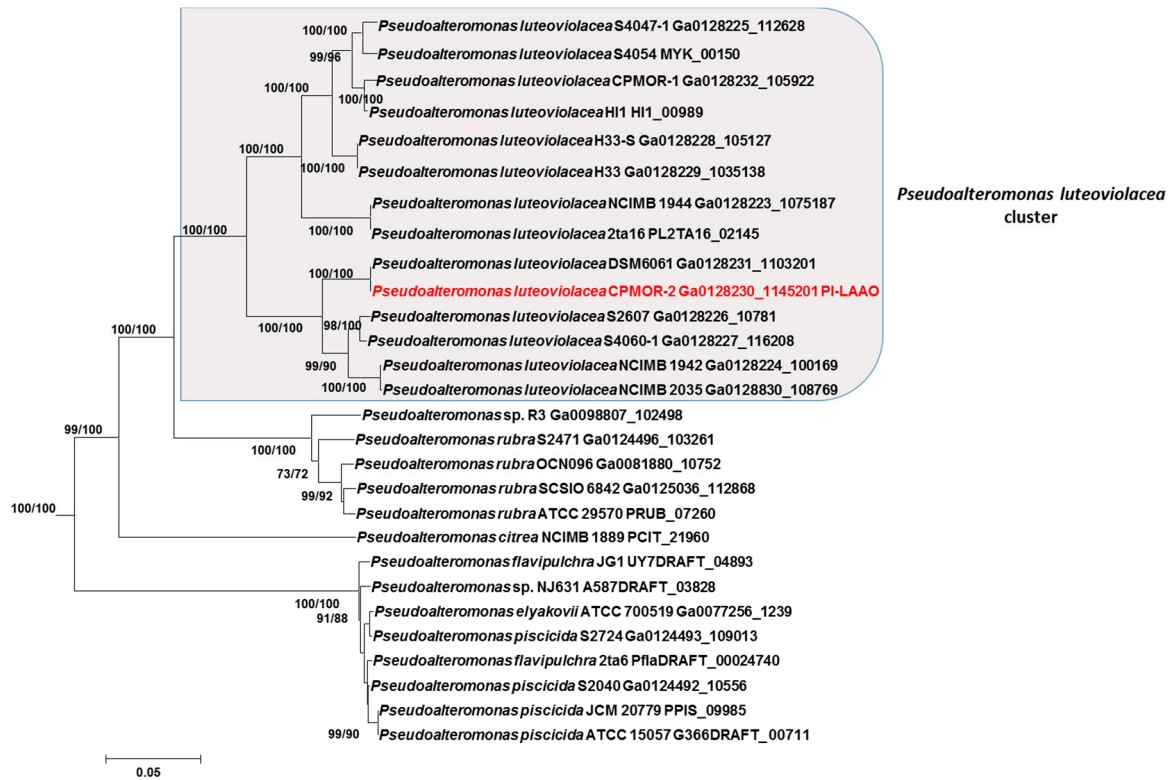

**Figure S2.** Phylogenetic relationships of Group 1, proteins similar to PI-LAAO in the genus *Pseudoalteromonas*. The tree was created by the NJ method integrated in the program MEGA6. Sequences were aligned using the program MUSCLE built in MEGA6. The evolutionary distances were computed using the p-distance method and are in the units of the number of amino acid differences per site. Numbers at branches indicate bootstrap values higher than 70% for both NJ and ML trees. PI-LAAO is indicated in red.

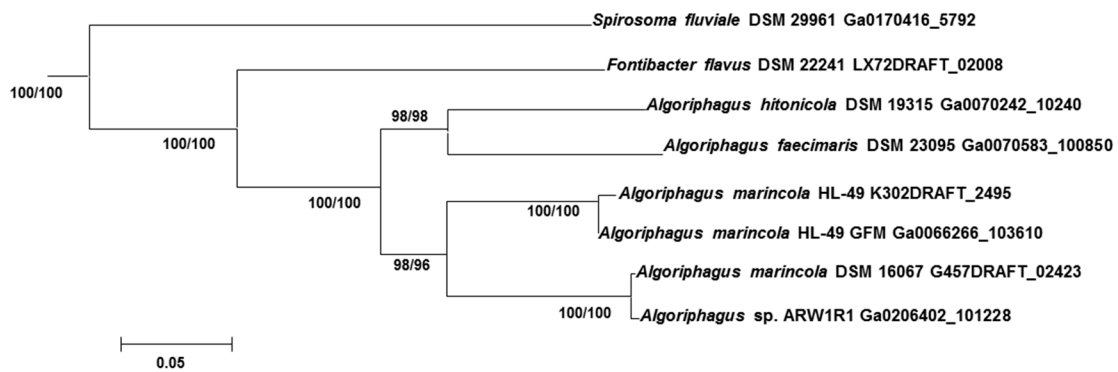

**Figure S3.** Phylogenetic relationships of Group 2 of proteins similar to PI-LAAO. The tree was created by the NJ method integrated in the program MEGA6. Sequences were aligned using the program MUSCLE built in MEGA6. The evolutionary distances were computed using the p-distance method and are in the units of the number of amino acid differences per site. Numbers at branches indicate bootstrap values higher than 70% for both NJ and ML trees.

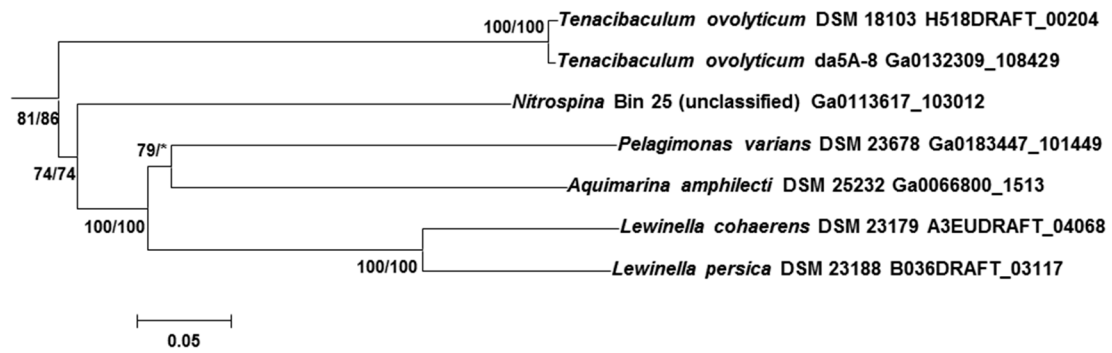

**Figure S4.** Phylogenetic relationships of Group 3 of proteins similar to Pl-LAAO. The tree was created by the NJ method integrated in the program MEGA6. Sequences were aligned using the program MUSCLE built in MEGA6. The evolutionary distances were computed using the p-distance method and are in the units of the number of amino acid differences per site. Numbers at branches indicate bootstrap values higher than 70% for both NJ and ML trees. An asterisk indicates that this branch was not detected, or it had a value lower than 70% in one of trees.
