# Supplementary material for: The Pseudoalteromonas luteoviolacea L-amino Acid Oxidase with Antimicrobial Activity Is a Flavoenzyme
Source: Mar Drugs. 2018 Dec 12;16(12):499. doi: 10.3390/md16120499 (PMC6316408; doi:10.3390/md16120499)
Supplement: Supplementary file 1 [file marinedrugs-16-00499-s001.zip › Supplementary-Table S1.xlsx]

## Sheet: Table S1
Table S1. Similar proteins to Pl-LAAO, deposited in the Integrated Microbial Genomes (IMG) database as of September 14, 2018.
Sequences are highlighted in colors to indicate to which phylogenetic group they belong.
Locus Tag	Genome Name	Domain	Phylum	Class	Order	Family	AA Length	COG	Pfam	Ecosystem	Ecosystem Category	Ecosystem Type	Habitat	Isolation	Relevance
HI1_00989	Pseudoalteromonas luteoviolacea HI1	Bacteria	Proteobacteria	Gammaproteobacteria	Alteromonadales	Pseudoalteromonadaceae	653		pfam01593 - Amino_oxidase	Environmental	Aquatic	Marine	Biofilm, Marine	Kewalo Marine Laboratory, Honolulu, HI, USA	Antibiotic production, Environmental
MYK_00150	Pseudoalteromonas luteoviolacea S4054	Bacteria	Proteobacteria	Gammaproteobacteria	Alteromonadales	Pseudoalteromonadaceae	653		pfam01593 - Amino_oxidase	Host-associated	Plants	Unclassified	Host	Pacific Ocean, Ecuador	Antibiotic production, Biotechnological
G366DRAFT_00711	Pseudoalteromonas piscicida ATCC 15057	Bacteria	Proteobacteria	Gammaproteobacteria	Alteromonadales	Pseudoalteromonadaceae	655		pfam01593 - Amino_oxidase	Environmental	Aquatic	Marine	Aquatic, Marine, Sea water	red-tide seawater	GEBA-KMG, Tree of Life
Ga0128830_108769	Pseudoalteromonas luteoviolacea NCIMB 2035	Bacteria	Proteobacteria	Gammaproteobacteria	Alteromonadales	Pseudoalteromonadaceae	653		pfam01593 - Amino_oxidase	_	_	_	_	_	Environmental
Ga0128232_105922	Pseudoalteromonas luteoviolacea CPMOR-1	Bacteria	Proteobacteria	Gammaproteobacteria	Alteromonadales	Pseudoalteromonadaceae	653		pfam01593 - Amino_oxidase	_	Aquatic	Marine	Marine	Mediterranean Sea	Environmental
Ga0128231_1103201	Pseudoalteromonas luteoviolacea DSM6061	Bacteria	Proteobacteria	Gammaproteobacteria	Alteromonadales	Pseudoalteromonadaceae	653		pfam01593 - Amino_oxidase	_	Aquatic	_	_	Surface seawater	Environmental
Ga0128230_1145201	Pseudoalteromonas luteoviolacea CPMOR-2	Bacteria	Proteobacteria	Gammaproteobacteria	Alteromonadales	Pseudoalteromonadaceae	653		pfam01593 - Amino_oxidase	_	Aquatic	Marine	Marine	Mediterranean Sea	Environmental
Ga0128229_1035138	Pseudoalteromonas luteoviolacea H33	Bacteria	Proteobacteria	Gammaproteobacteria	Alteromonadales	Pseudoalteromonadaceae	653		pfam01593 - Amino_oxidase	_	_	_	_	_	Environmental
Ga0128228_105127	Pseudoalteromonas luteoviolacea H33-S	Bacteria	Proteobacteria	Gammaproteobacteria	Alteromonadales	Pseudoalteromonadaceae	653		pfam01593 - Amino_oxidase	_	_	_	_	_	Environmental
Ga0128227_116208	Pseudoalteromonas luteoviolacea S4060-1	Bacteria	Proteobacteria	Gammaproteobacteria	Alteromonadales	Pseudoalteromonadaceae	653		pfam01593 - Amino_oxidase	_	_	_	_	_	Environmental
Ga0128225_112628	Pseudoalteromonas luteoviolacea S4047-1	Bacteria	Proteobacteria	Gammaproteobacteria	Alteromonadales	Pseudoalteromonadaceae	653		pfam01593 - Amino_oxidase	_	_	_	_	_	Environmental
Ga0128224_100169	Pseudoalteromonas luteoviolacea NCIMB 1942	Bacteria	Proteobacteria	Gammaproteobacteria	Alteromonadales	Pseudoalteromonadaceae	653		pfam01593 - Amino_oxidase	_	Aquatic	Marine	_	_	Environmental
Ga0128223_1075187	Pseudoalteromonas luteoviolacea NCIMB 1944	Bacteria	Proteobacteria	Gammaproteobacteria	Alteromonadales	Pseudoalteromonadaceae	653		pfam01593 - Amino_oxidase	_	Aquatic	Marine	_	_	Environmental
Ga0125036_112868	Pseudoalteromonas rubra SCSIO 6842	Bacteria	Proteobacteria	Gammaproteobacteria	Alteromonadales	Pseudoalteromonadaceae	653		pfam01593 - Amino_oxidase	_	Aquatic	_	_	Sea water (Bay of Benga, Indian Ocean)	Environmental
Ga0128226_10781	Pseudoalteromonas luteoviolacea S2607	Bacteria	Proteobacteria	Gammaproteobacteria	Alteromonadales	Pseudoalteromonadaceae	653		pfam01593 - Amino_oxidase	_	_	_	_	_	Environmental
Ga0124496_103261	Pseudoalteromonas rubra S2471	Bacteria	Proteobacteria	Gammaproteobacteria	Alteromonadales	Pseudoalteromonadaceae	653		pfam01593 - Amino_oxidase	Host-associated	Aquatic	Marine	_	mussel	Environmental
Ga0124492_10556	Pseudoalteromonas piscicida S2040	Bacteria	Proteobacteria	Gammaproteobacteria	Alteromonadales	Pseudoalteromonadaceae	655		pfam01593 - Amino_oxidase	Host-associated	Aquatic	Marine	Marine	copepod	Environmental
Ga0124493_109013	Pseudoalteromonas piscicida S2724	Bacteria	Proteobacteria	Gammaproteobacteria	Alteromonadales	Pseudoalteromonadaceae	655		pfam01593 - Amino_oxidase	_	Aquatic	Marine	_	Wood. Solomon Islands	Environmental
Ga0098807_102498	Pseudoalteromonas sp. R3	Bacteria	Proteobacteria	Gammaproteobacteria	Alteromonadales	Pseudoalteromonadaceae	653		pfam01593 - Amino_oxidase		_	_	_	Sludge sample, Zhoushan, China	_
Ga0081880_10752	Pseudoalteromonas rubra OCN096	Bacteria	Proteobacteria	Gammaproteobacteria	Alteromonadales	Pseudoalteromonadaceae	653		pfam01593 - Amino_oxidase	Host-associated	Aquatic	Marine	_	Coral mucus, Kaneohe Bay, Hawaii (USA)	Environmental
Ga0077256_1239	Pseudoalteromonas elyakovii ATCC 700519	Bacteria	Proteobacteria	Gammaproteobacteria	Alteromonadales	Pseudoalteromonadaceae	655		pfam01593 - Amino_oxidase	Host-associated	Aquatic	Marine	_	Mussel, Russia	Environmental
PflaDRAFT_00024740	Pseudoalteromonas flavipulchra 2ta6	Bacteria	Proteobacteria	Gammaproteobacteria	Alteromonadales	Pseudoalteromonadaceae	655		pfam01593 - Amino_oxidase	Host-associated	Cnidaria	Unclassified	Marine	cleractinian corals (Montastrea annularis) in Floridian reef waters	Ecological, Environmental, Marine Microbial Initiative (MMI)
PL2TA16_02145	Pseudoalteromonas luteoviolacea 2ta16	Bacteria	Proteobacteria	Gammaproteobacteria	Alteromonadales	Pseudoalteromonadaceae	653		pfam01593 - Amino_oxidase	Host-associated	Cnidaria	Unclassified	Host, Marine	cleractinian corals (Montastrea annularis) in Floridian reef waters	Environmental
A587DRAFT_03828	Pseudoalteromonas sp. NJ631	Bacteria	Proteobacteria	Gammaproteobacteria	Alteromonadales	Pseudoalteromonadaceae	655		pfam01593 - Amino_oxidase	Environmental	Aquatic	Marine	_	_	_
UY7DRAFT_04893	Pseudoalteromonas flavipulchra JG1	Bacteria	Proteobacteria	Gammaproteobacteria	Alteromonadales	Pseudoalteromonadaceae	655		pfam01593 - Amino_oxidase	Host-associated	Fish	Unclassified	Aquatic	_	Environmental
PPIS_09985	Pseudoalteromonas piscicida JCM 20779	Bacteria	Proteobacteria	Gammaproteobacteria	Alteromonadales	Pseudoalteromonadaceae	655		pfam01593 - Amino_oxidase	Environmental	Aquatic	Marine	Aquatic, Marine, Sea water	red-tide seawater	_
PCIT_21960	Pseudoalteromonas citrea NCIMB 1889	Bacteria	Proteobacteria	Gammaproteobacteria	Alteromonadales	Pseudoalteromonadaceae	655		pfam01593 - Amino_oxidase	Environmental	Aquatic	Marine	Aquatic, Marine	seawater	_
PRUB_07260	Pseudoalteromonas rubra ATCC 29570	Bacteria	Proteobacteria	Gammaproteobacteria	Alteromonadales	Pseudoalteromonadaceae	653		pfam01593 - Amino_oxidase	Environmental	Aquatic	Marine	Aquatic, Marine	surface seawater, France	Anti-tumor agent, Antibiotic production
K302DRAFT_2495	Algoriphagus marincola HL-49	Bacteria	Bacteroidetes	Cytophagia	Cytophagales	Cyclobacteriaceae	555	COG1231 - Monoamine oxidase	pfam01593 - Amino_oxidase	_	_	_	_	_	_
G457DRAFT_02423	Algoriphagus marincola DSM 16067	Bacteria	Bacteroidetes	Cytophagia	Cytophagales	Cyclobacteriaceae	556	COG1231 - Monoamine oxidase	pfam01593 - Amino_oxidase	Environmental	Aquatic	Marine	Aquatic, Marine, Sea water	Sea water	GEBA-KMG, Tree of Life
Ga0206402_101228	Algoriphagus sp. ARW1R1	Bacteria	Bacteroidetes	Cytophagia	Cytophagales	Cyclobacteriaceae	556	COG1231 - Monoamine oxidase	pfam01593 - Amino_oxidase	Host-associated	Protists	_	_	Culture of Phaeodactylum	_
Ga0070242_10240	Algoriphagus hitonicola DSM 19315	Bacteria	Bacteroidetes	Cytophagia	Cytophagales	Cyclobacteriaceae	552	COG1231 - Monoamine oxidase	pfam01593 - Amino_oxidase	_	Aquatic	_	_	Salty water from a lagoon, Spain	_
LX72DRAFT_02008	Fontibacter flavus DSM 22241	Bacteria	Bacteroidetes	Cytophagia	Cytophagales	Cyclobacteriaceae	562	COG1231 - Monoamine oxidase	pfam01593 - Amino_oxidase	_	_	_	_	Water with temperatures from 45 to 65 °C, Taiwan	_
Ga0070583_100850	Algoriphagus faecimaris DSM 23095	Bacteria	Bacteroidetes	Cytophagia	Cytophagales	Cyclobacteriaceae	552	COG1231 - Monoamine oxidase	pfam01593 - Amino_oxidase	_	Aquatic		Sediment	Coastal sediment, China	_
Ga0066266_103610	Algoriphagus marincola HL-49 GFM	Bacteria	Bacteroidetes	Cytophagia	Cytophagales	Cyclobacteriaceae	334		pfam01593 - Amino_oxidase	Environmental	Aquatic	Non-marine Saline and Alkaline	Hypersaline	Pacific Northwest National Laboratory, Washington, USA
Ga0170416_5792	Spirosoma fluviale DSM 29961	Bacteria	Bacteroidetes	Cytophagia	Cytophagales	Cytophagaceae	548	COG1231 - Monoamine oxidase	pfam01593 - Amino_oxidase	_	Aquatic	River	_	Hosoda river, Japan	_
Ga0183447_101449	Pelagimonas varians DSM 23678	Bacteria	Proteobacteria	Alphaproteobacteria	Rhodobacterales	Rhodobacteraceae	594	COG1233 - Phytoene dehydrogenase-related protein	pfam01593 - Amino_oxidase	_	Aquatic	Marine	Marine	North Sea	_
A3EUDRAFT_04068	Lewinella cohaerens DSM 23179	Bacteria	Bacteroidetes	Saprospiria	Saprospirales	Lewinellaceae	602		pfam01593 - Amino_oxidase	Environmental	Aquatic	Marine	Sea sand	Beach sand, Biarritz, France	GEBA-KMG, Tree of Life
B036DRAFT_03117	Lewinella persica DSM 23188	Bacteria	Bacteroidetes	Saprospiria	Saprospirales	Lewinellaceae	604		pfam01593 - Amino_oxidase	Environmental	Terrestrial	Soil	Mud	Brown mud, Galway, Ireland	GEBA-KMG, Tree of Life
Ga0066800_1513	Aquimarina amphilecti DSM 25232	Bacteria	Bacteroidetes	Flavobacteriia	Flavobacteriales	Flavobacteriaceae	611		pfam13450 - NAD_binding_8	_	_	_	_	_	_
H518DRAFT_00204	Tenacibaculum ovolyticum DSM 18103	Bacteria	Bacteroidetes	Flavobacteriia	Flavobacteriales	Flavobacteriaceae	563		pfam01593 - Amino_oxidase	Host-associated	Fish	Unclassified	Fish, Host, Marine	Halibut Eggs	GEBA-KMG, Tree of Life
Ga0132309_108429	Tenacibaculum ovolyticum da5A-8	Bacteria	Bacteroidetes	Flavobacteriia	Flavobacteriales	Flavobacteriaceae	563		pfam01593 - Amino_oxidase	_	Marine	Marine	Marine	Seewater, Japan	Environmental
Ga0113617_103012	unclassified Nitrospina Bin 25	Bacteria	Nitrospinae	Nitrospinia	Nitrospinales	Nitrospinaceae	561		pfam01593 - Amino_oxidase	Environmental	Aquatic	Marine	Marine	northern Gulf of Mexico	Environmental
Ga0075264_11287	Cyclobacterium halophilum IBRC-M 10761	Bacteria	Bacteroidetes	Cytophagia	Cytophagales	Cyclobacteriaceae	676		pfam01593 - Amino_oxidase		Aquatic	Marine	_	Soil, coastal-marine wetland of Gomishan, Iran	_
Ga0170422_3905	Fabibacter pacificus DSM 100771	Bacteria	Bacteroidetes	Cytophagia	Cytophagales	Flammeovirgaceae	655		pfam01593 - Amino_oxidase	_	Aquatic	Marine	Marine	Pacific Ocean East	_
Ga0170416_3163	Spirosoma fluviale DSM 29961	Bacteria	Bacteroidetes	Cytophagia	Cytophagales	Cytophagaceae	660		pfam01593 - Amino_oxidase	_	Aquatic	River	_	Hosoda river, Japan	_
Ga0079854_1970	Fabibacter pacificus CGMCC 1.12402	Bacteria	Bacteroidetes	Cytophagia	Cytophagales	Flammeovirgaceae	655		pfam01593 - Amino_oxidase	_	Aquatic	Marine	Marine	Eastern Pacific Ocean	_
Ga0079935_103176	Cyano_bin6_Bacteroidetes	Bacteria	Bacteroidetes	unclassified	unclassified	unclassified	685	COG1232 - Protoporphyrinogen oxidase	pfam01593 - Amino_oxidase	Host-associated	Cnidaria	Unclassified	Cnidaria	Looe Key Reef, Florida Keys National Marine Sanctuary, coral reef	_
Ga0115514_12949	Variovorax sp. CF079	Bacteria	Proteobacteria	Betaproteobacteria	Burkholderiales	Comamonadaceae	526	COG1231 - Monoamine oxidase	pfam01593 - Amino_oxidase	_	_	_	_	Populus root and rhizosphere microbial communities from Tennessee, USA	_
